# Supplementary material
Source: publisher site journal article supplement (https://www.dovepress.com/get_supplementary_file.php?f=341015.docx)
Supplement: Supplementary file 1 [file get_supplementary_file.php]

Correlation between Apelin and Collateral Circulation in Patients with Middle Cerebral Artery Occlusion and Moyamoya Disease

*Hanlin Wu 1, Chengyu Xia 2, Rui Li 1,Chunrong Tao 1,Qiqiang Tang 1, Wei Hu 1*

Propensity matching analysis between MMD and occlusion group

Table : Paired sample t-test after Propensity matching for MMD and MCAO group

|  | | average value | Standard deviation | 95% confidence interval of the difference | | T value | P-value |
| --- | --- | --- | --- | --- | --- | --- | --- |
| Pair 1 | MMD-MCAO apelin13 | 1121.12 | 1905.44 | 105.78 | 2136.45 | 2.354 | .033 |
| Pair 2 | MMD-MCAO apelin17 | 61.58 | 100.85 | 11.43 | 111.73 | 2.591 | .019 |
| Pair 3 | MMD-MCAO apelin36 | 237.75 | 738.97 | -129.74 | 605.23 | 1.365 | .190 |
| Pair 4 | MMD-MCAO NO | -23.84 | 156.01 | -101.42 | 53.74 | -.648 | .525 |
| Pair 5 | MMD-MCAO VEGF | -28.82 | 114.55 | -94.96 | 37.32 | -.941 | .364 |

Supplementary file: After propensity matching, we conducted an intergroup test on 18 pairs of samples corrected for age, gender and BMI, and the results showed that plasma apelin-13 and apelin-17 levels were still significantly higher in the MMD group than MCA occlusion group.
